# Supplementary material
Source: MDPI journal article supplement (https://www.mdpi.com/2571-550X/6/3/49)
Supplement: s1 [file s1]

# Diatom assemblages from the Daginsky Mud Volcano sediments (Eastern Sakhalin) and their implication

Ira B. Tsoy\*, Anna V. Sorochnikaya

Il'ichev Pacific Oceanological Institute FEB RAS, 43 Baltijskaya, Vladivostok 690041, Russia

\*correspondence: tsoy@poi.dvo.ru

Table S1. List of studied samples from the Daginsky Mud Volcano, Eastern Sakhalin. Sample number, coordinates, sediment type, and total diatom content.

| Sample number  | Latitude, N            | Longitude, E | Sediment type  | Content of diatoms (mln valves/g) |
|----------------|------------------------|--------------|----------------|-----------------------------------|
| D01-1          | 52°02'50"              | 143°05'38"   | clayey silt    | 0.70                              |
| D12-1          | 52°02'50"              | 143°05'41"   | clayey silt    | 3.41                              |
| D12-2          | 52°02'52"              | 143°05'42"   | clayey silt    | 2.44                              |
| D12-4          | 52°02'51"              | 143°05'39"   | clayey silt    | 4.96                              |
| D12-6          | 52°02'48"              | 143°05'40"   | clayey silt    | 2.92                              |
| T2-6           | 52°02'50.1"            | 143°05'42.7" | compacted silt | 3.61                              |
| T3-7           | 5 m south-west of T2-6 |              | clayey silt    | 9.06                              |
| T4-8           | 52°02'48.8"            | 143°05'41.5" | clayey silt    | 5.10                              |
| T1-1           | 52°02'58.8"            | 143°05'38.8" | clayey silt    | 9.10                              |
| T1-2           | "_"                    | "_"          | clayey silt    | 8.50                              |
| T1-3 (10-11cm) | "_"                    | "_"          | compacted silt | 2.74                              |
| T1-4 (30-31cm) | "_"                    | "_"          | compacted silt | 7.43                              |
| T1-5 (40-41cm) | "_"                    | "_"          | compacted silt | 2.13                              |
